# Supplementary material
Source: publisher site journal article supplement (https://www.spandidos-publications.com/5784/downloadSupplementary)

Figure S1. Tumor cells were positive for cytokeratin 5.2 (magnification, x200; scale bar, 100  $\mu\text{m}$ ).

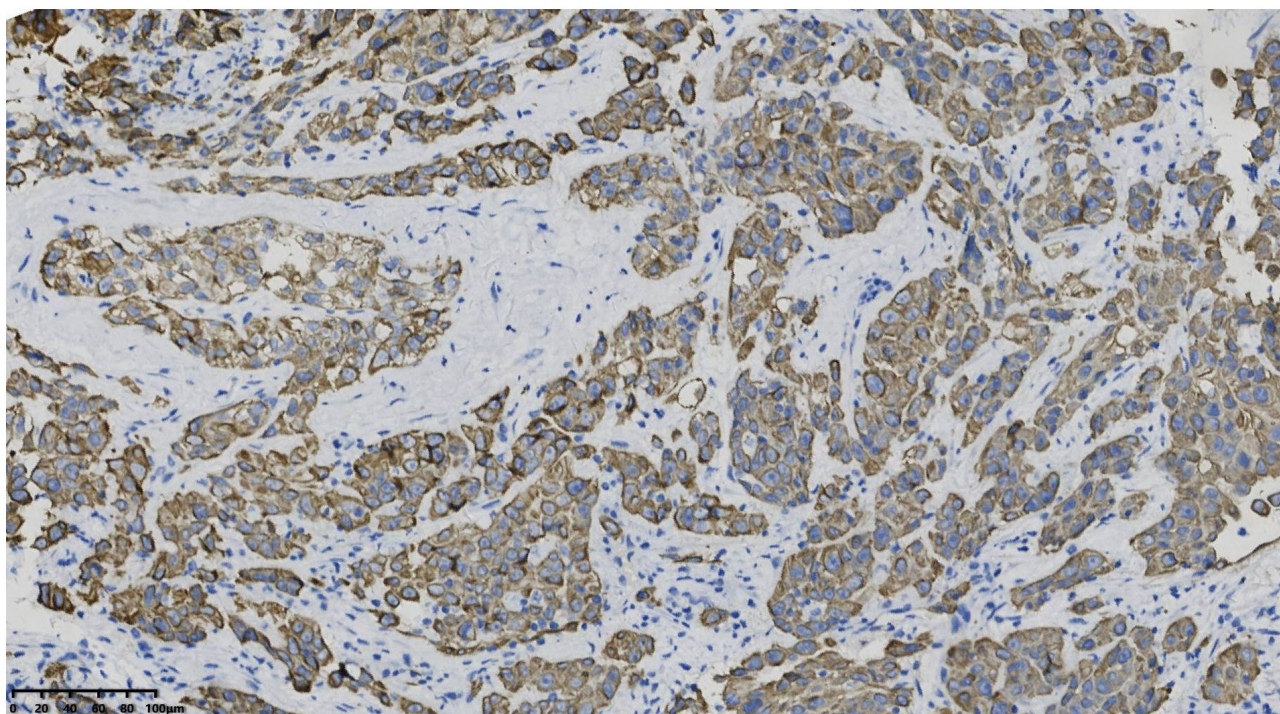

Figure S2. Tumor cells were positive for CK5/6 (magnification, x200; scale bar, 100  $\mu$ m).

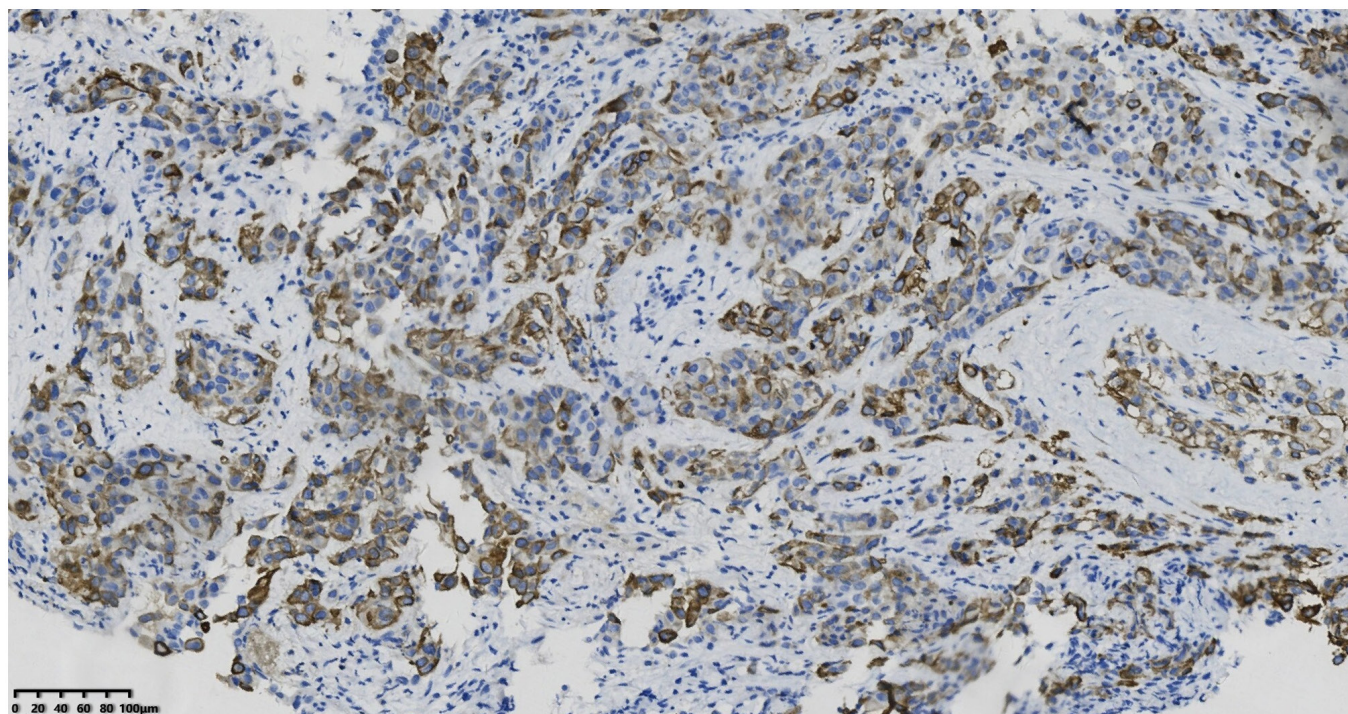

Figure S3. Tumor cells were positive for calretinin (magnification, x200; scale bar, 100  $\mu\text{m}$ ).

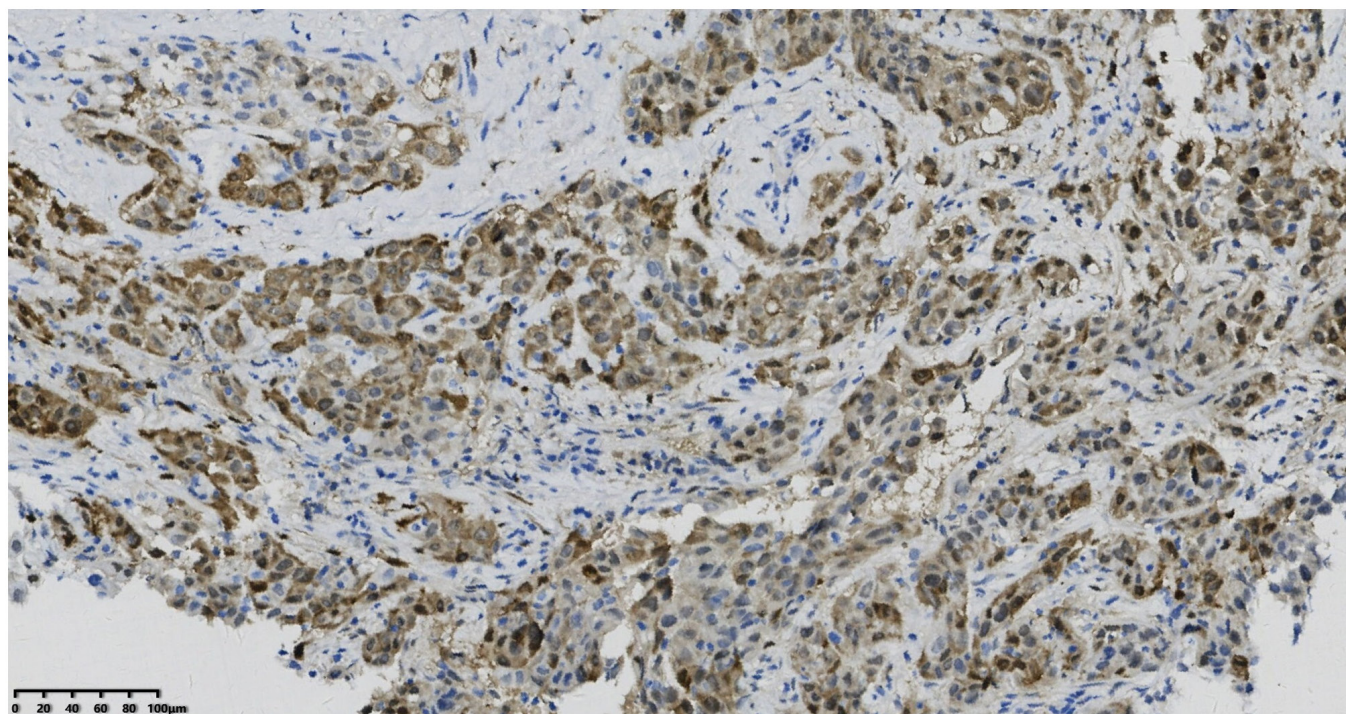

Figure S4. Tumor cells were negative for thyroid transcription factor-1(magnification, x200; scale bar, 100  $\mu$ m).

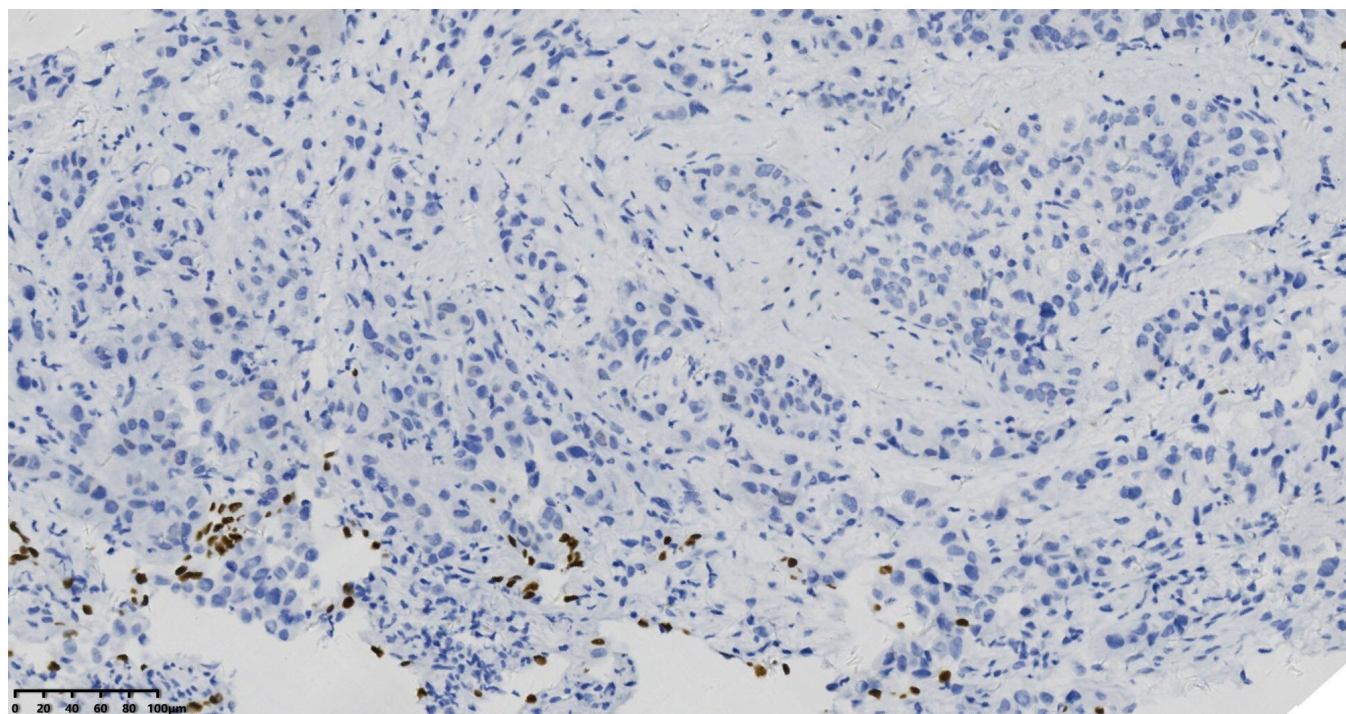

Figure S5. Tumor cells were negative for NapsinA (magnification, x200; scale bar, 100  $\mu\text{m}$ ).

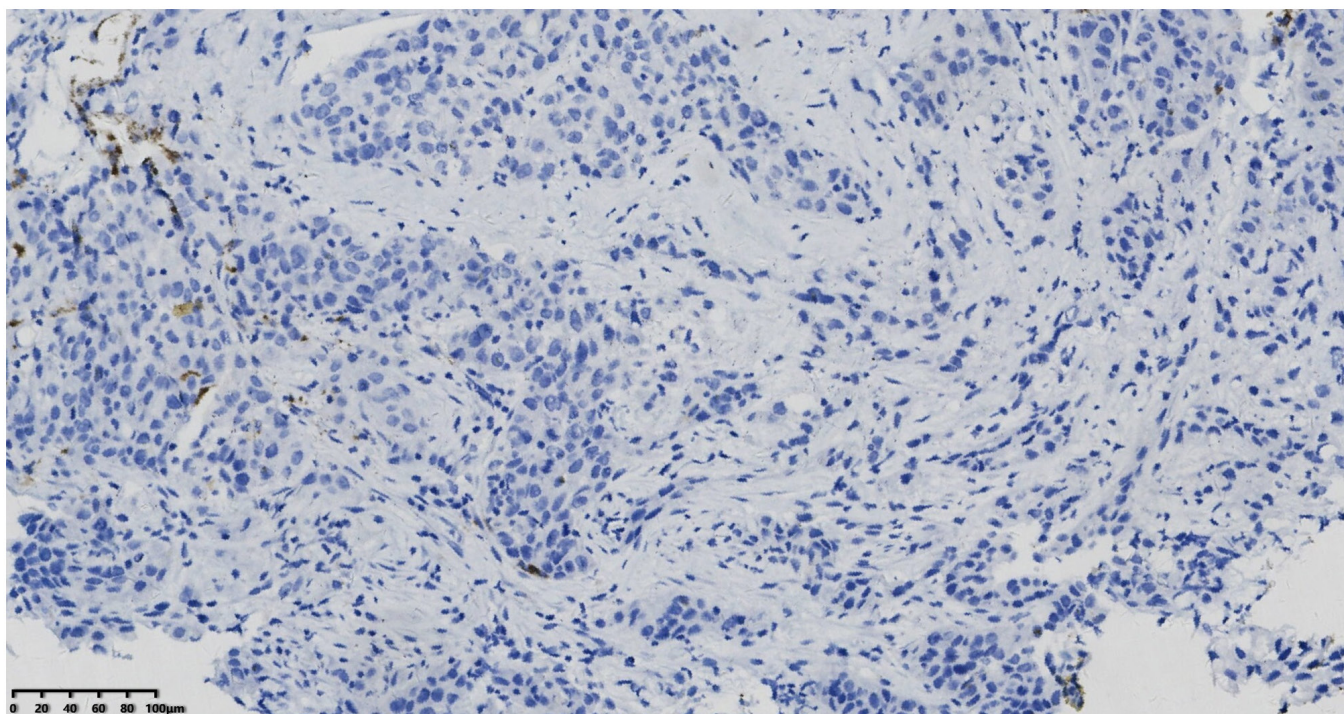

Figure S6. Tumor cells were negative for p40 (magnification, x200; scale bar, 100  $\mu$ m).

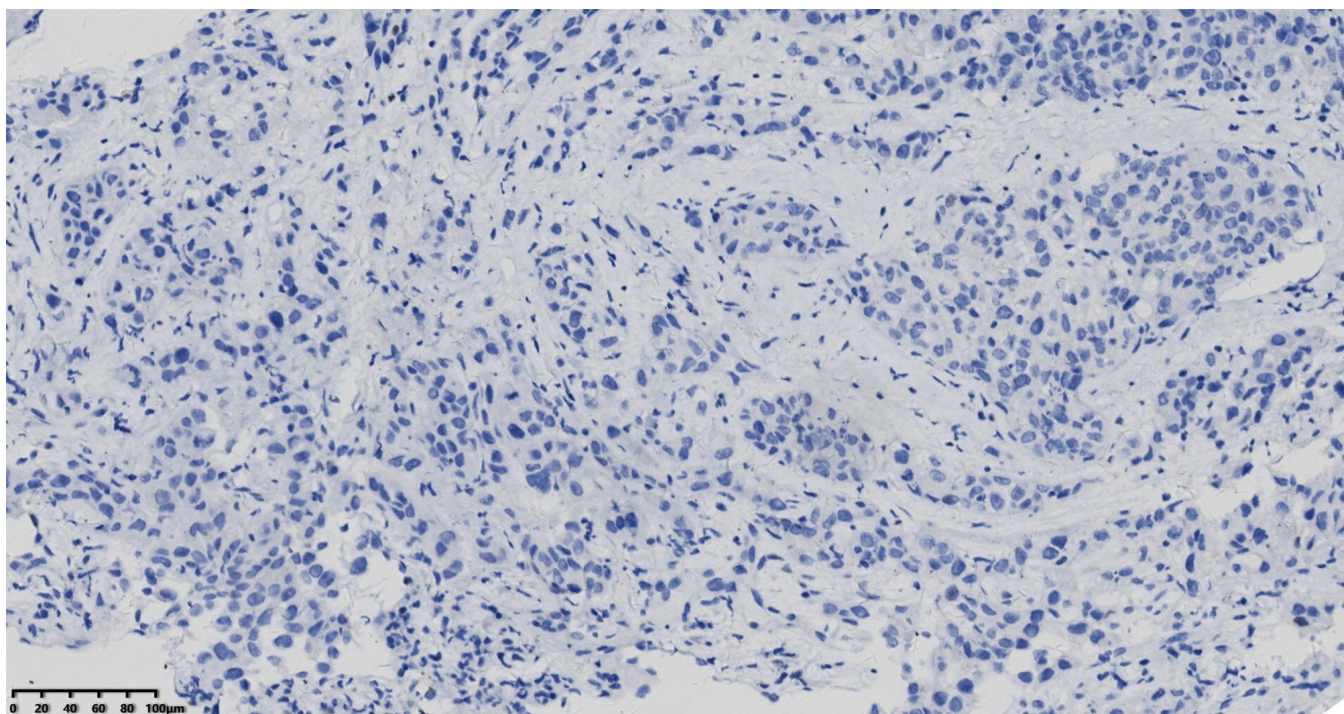

Figure S7. Tumor cells were negative for synaptophysin (magnification, x200; scale bar, 100  $\mu$ m).

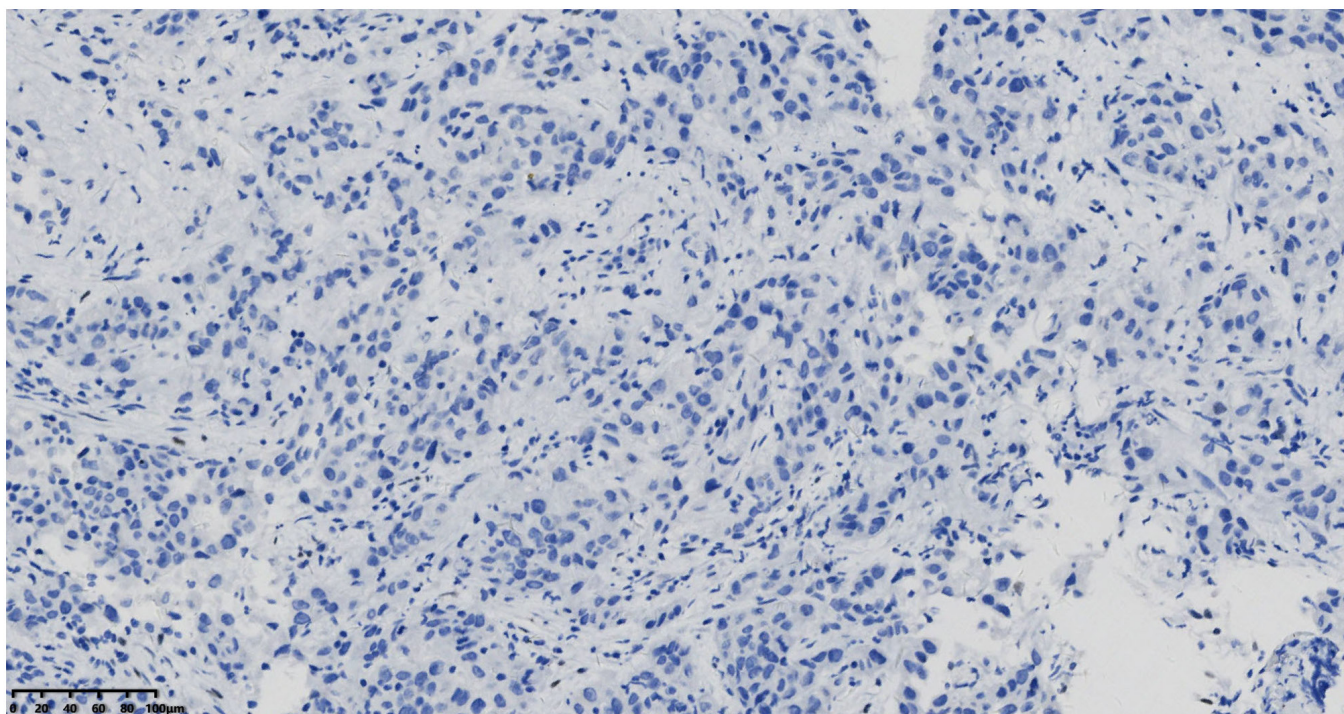

Figure S8. Tumor cells were negative for chromogranin A (magnification, x200; scale bar, 100  $\mu$ m).

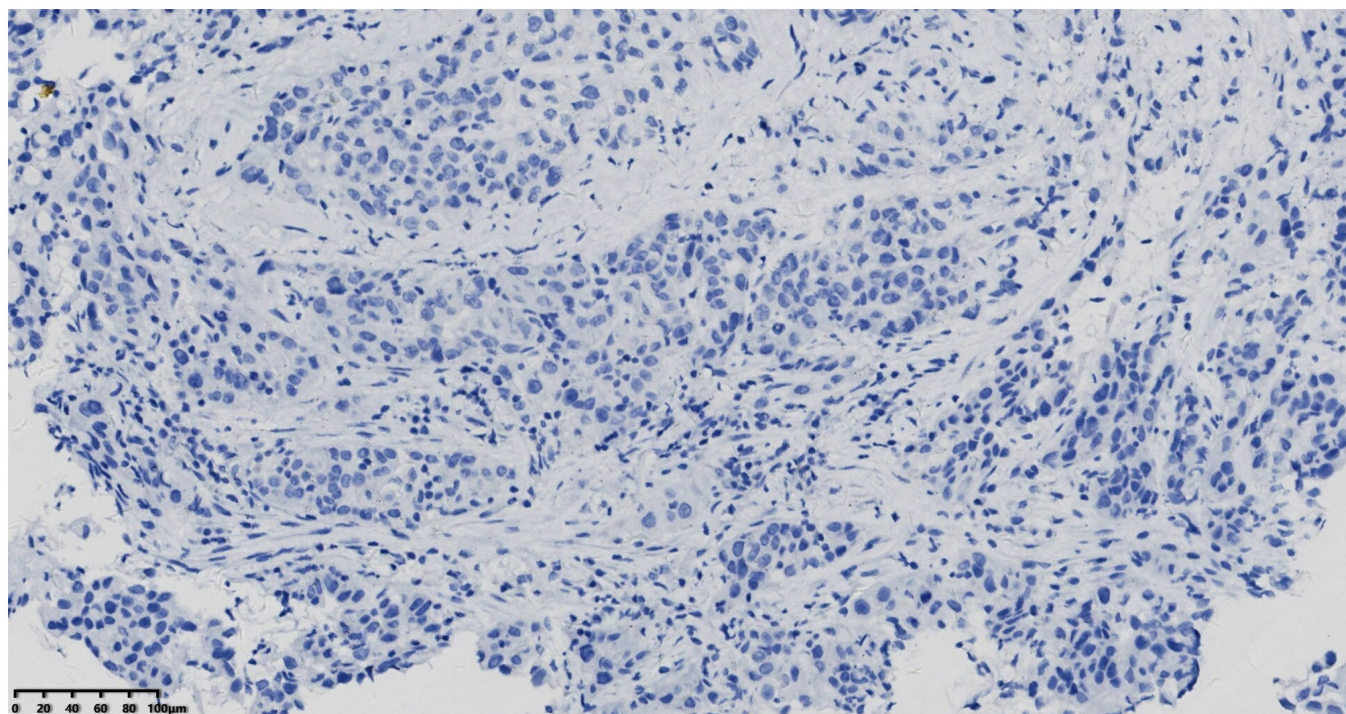

Figure S9. Tumor cells were negative for SRY-box transcription factor 2 (magnification, x200; scale bar, 100  $\mu$ m).

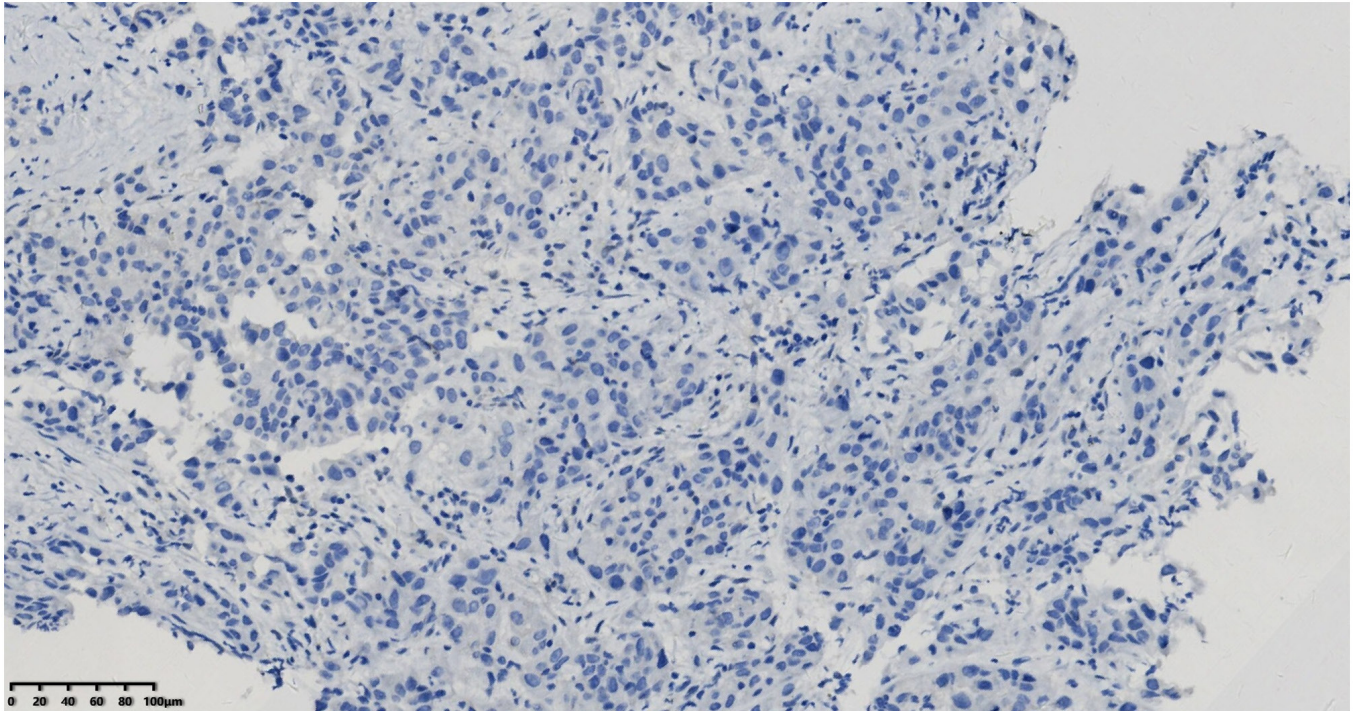

Figure S10. Tumor cells were negative for CD34 (magnification, x200; scale bar, 100  $\mu\text{m}$ ).

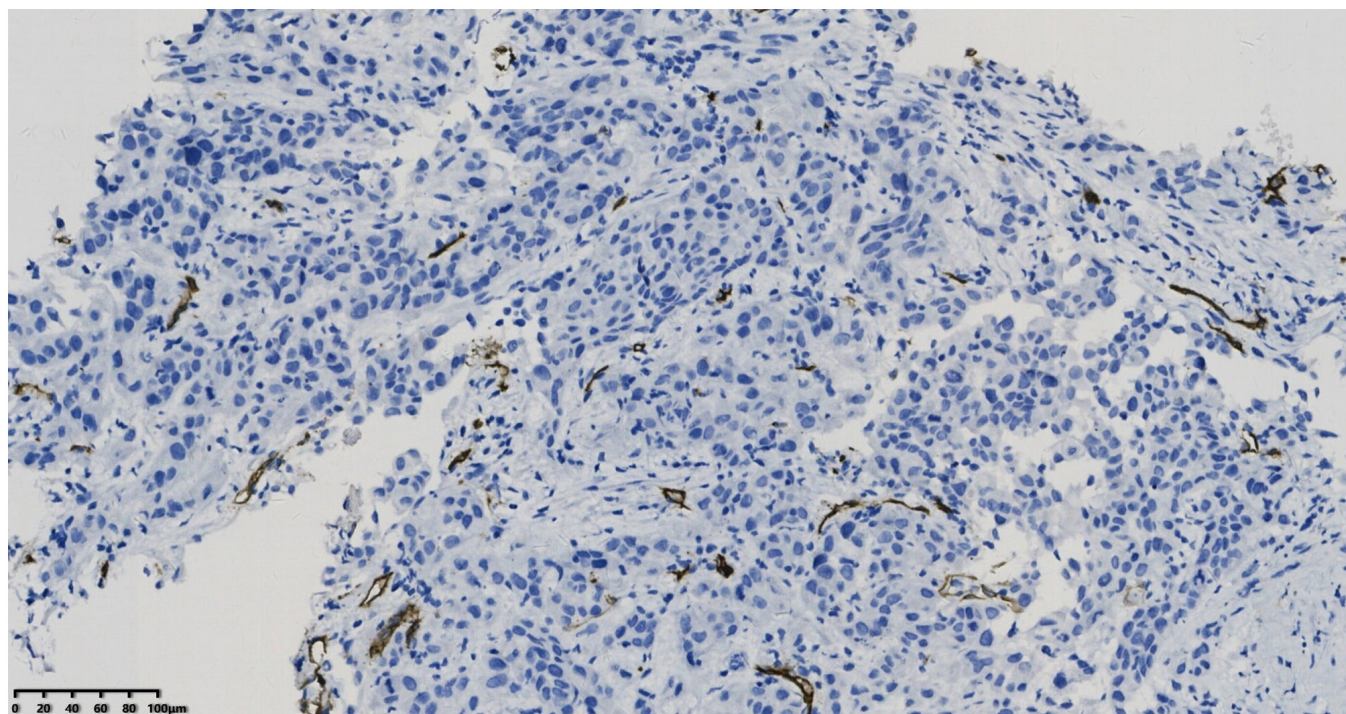

Figure S11. Tumor cells were negative for sal-like protein 4 (magnification, x200; scale bar, 100  $\mu$ m).

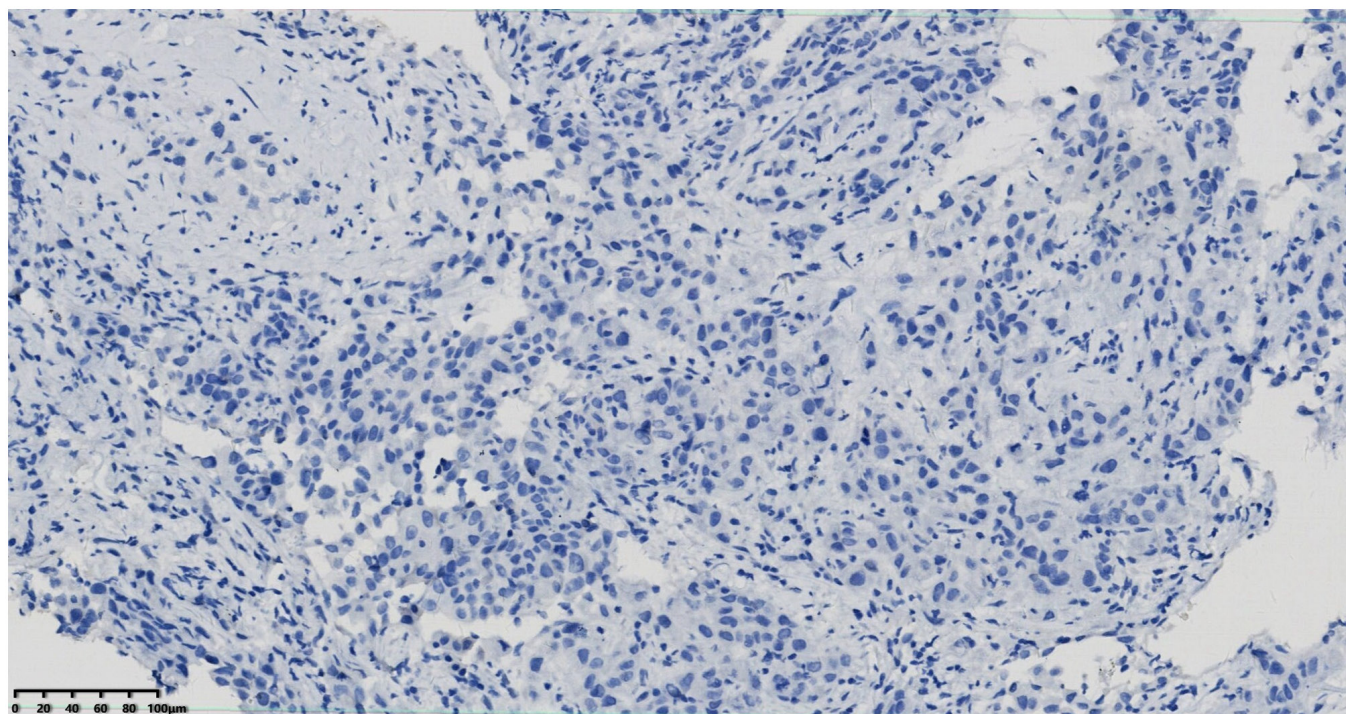

Figure S12. Tumor cells were negative for nuclear protein in testis (magnification, x200; scale bar, 100  $\mu\text{m}$ ).

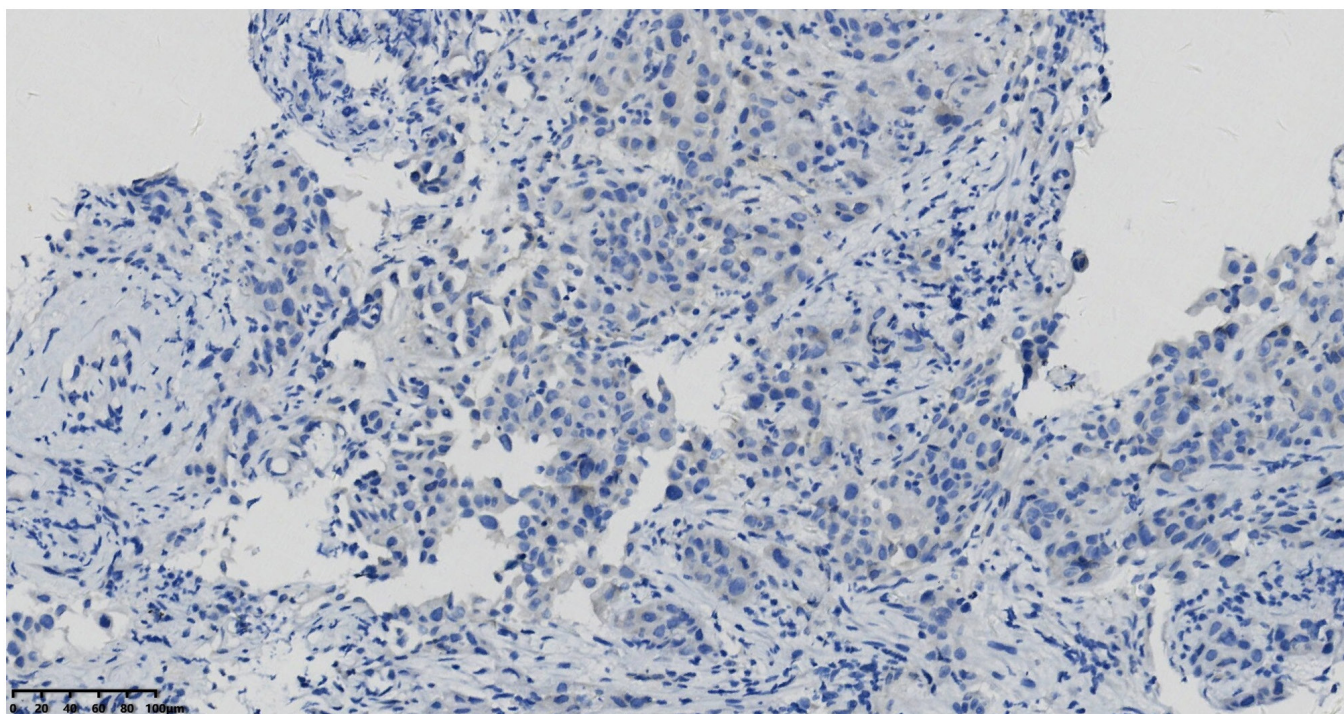

Figure S13. Tumor cells were negative for ALK (magnification, x200; scale bar, 100  $\mu$ m).

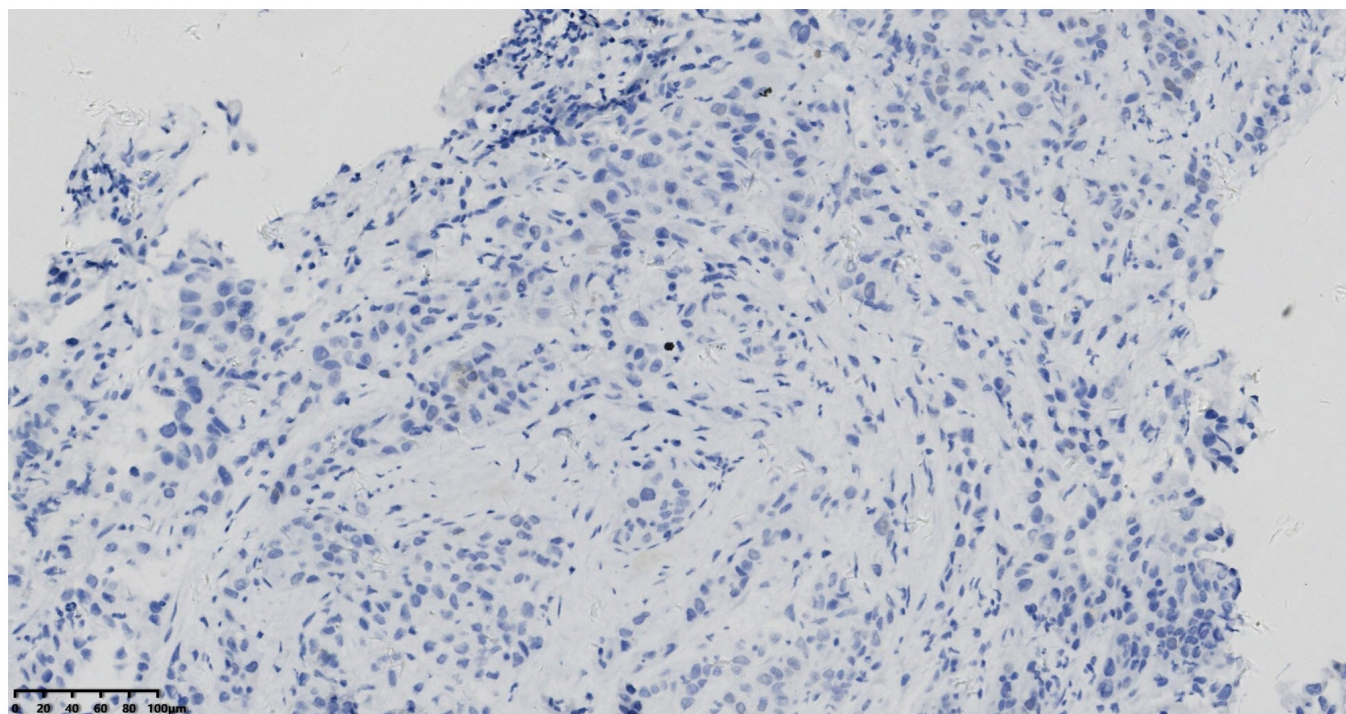

Figure S14. Tumor cells were negative for podoplanin (magnification, x200; scale bar, 100  $\mu$ m).

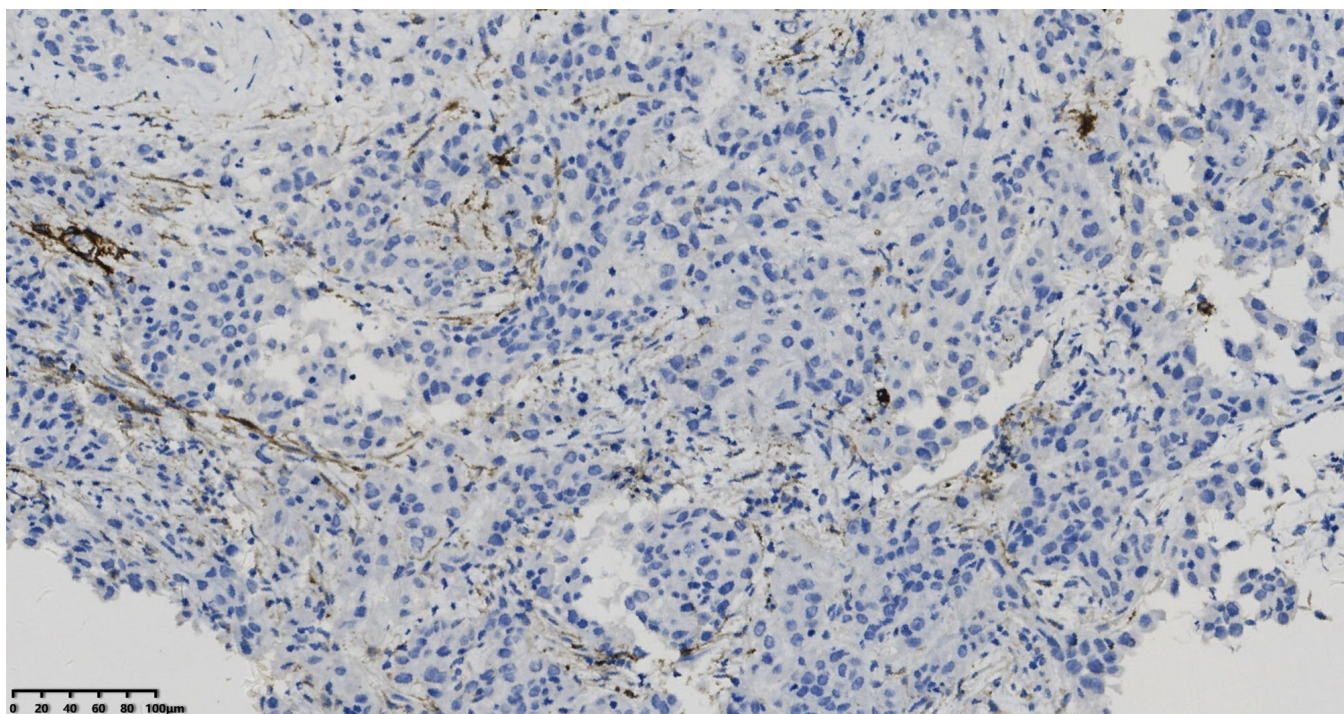

Figure S15. Tumor cells were negative for Wilm's tumor protein 1 (magnification, x200; scale bar, 100  $\mu$ m).

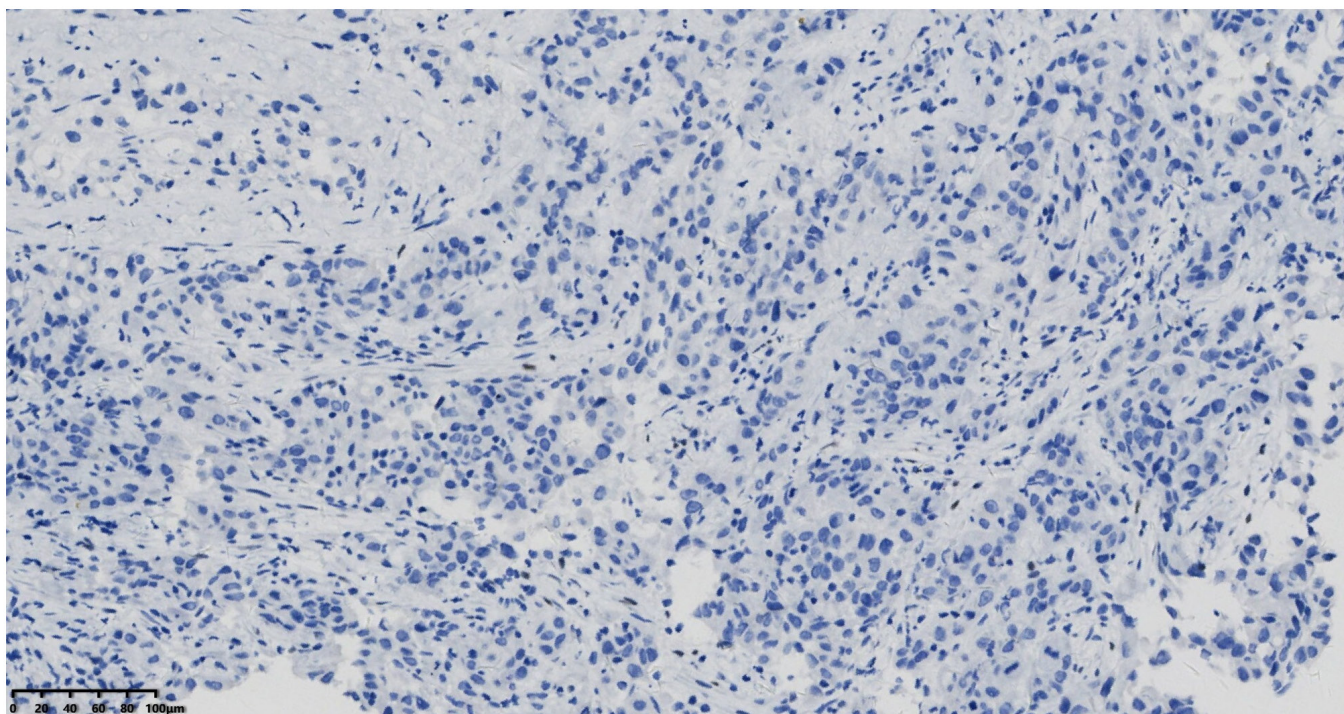

Figure S16. Tumor cells were positive for vimentin (magnification, x200; scale bar, 100  $\mu\text{m}$ ).

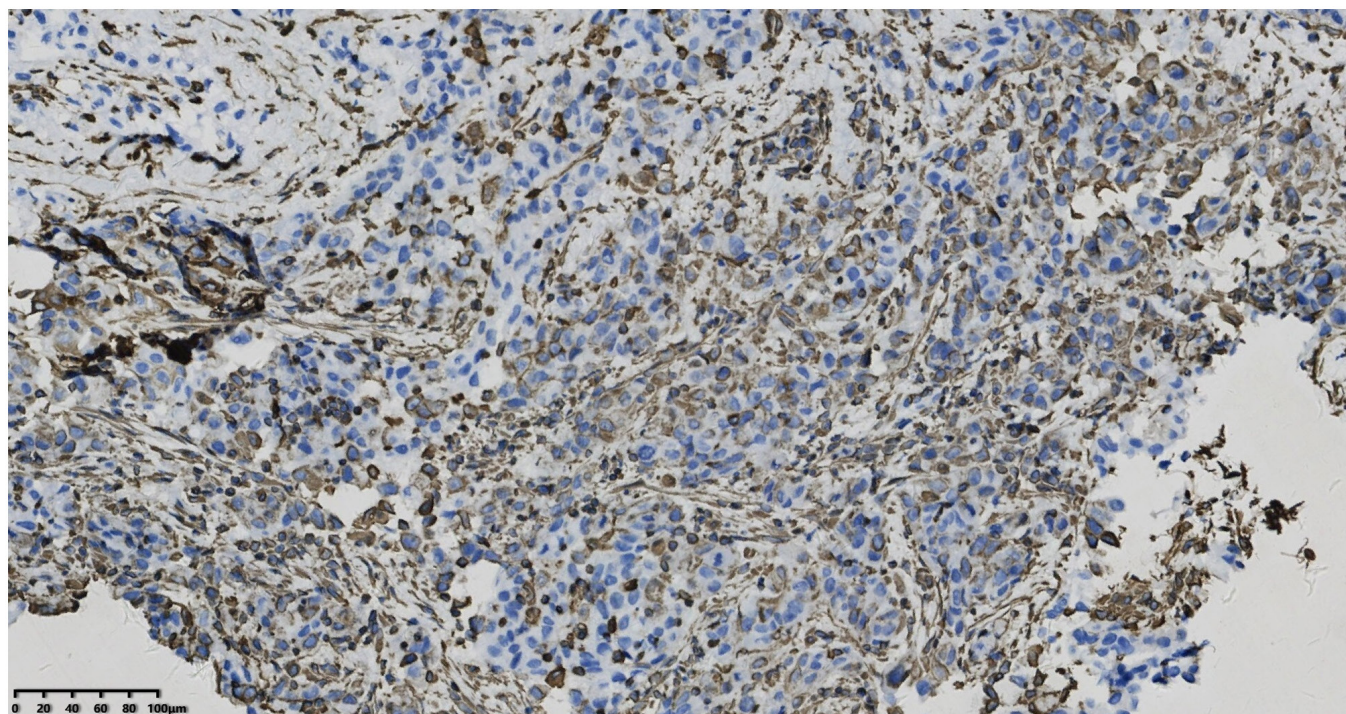

Figure S17. Tumor cells were negative for GATA binding protein 3 (magnification, x200; scale bar, 100  $\mu$ m).

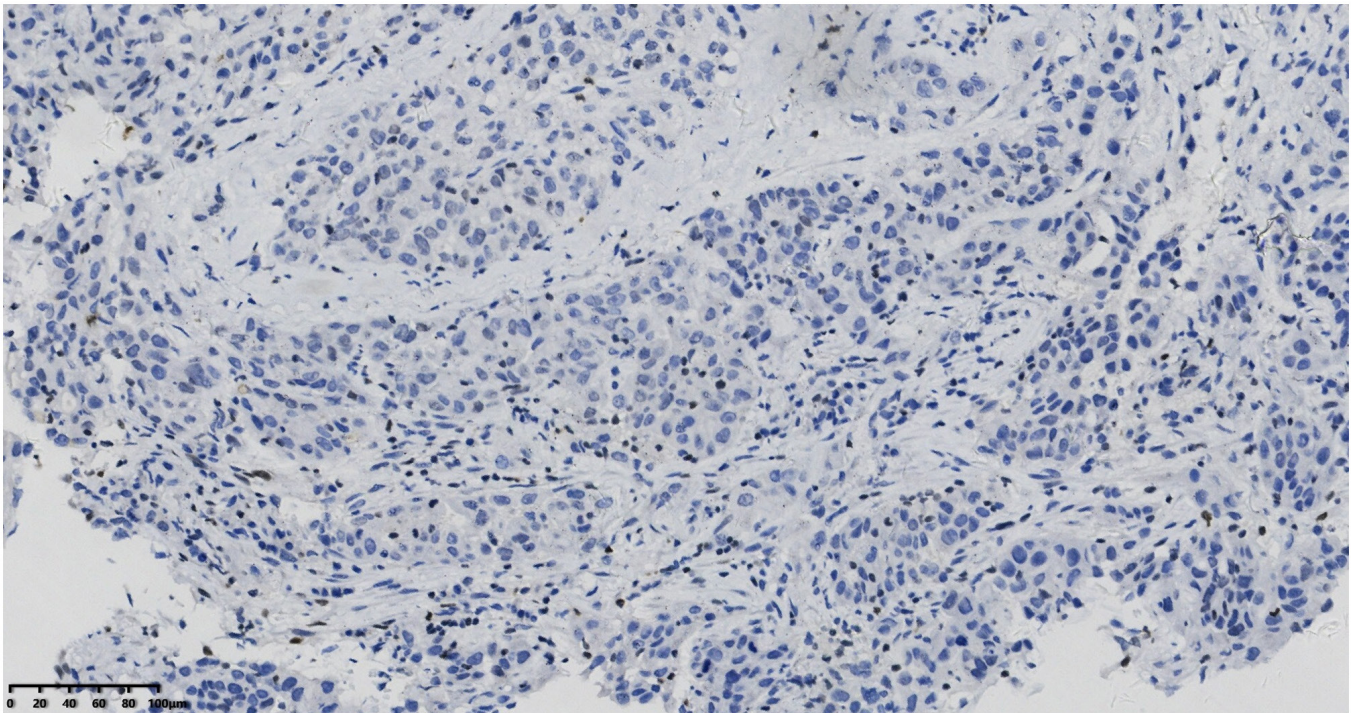

Figure S18. Tumor cells were negative for estrogen receptor (magnification, x200; scale bar, 100  $\mu$ m).

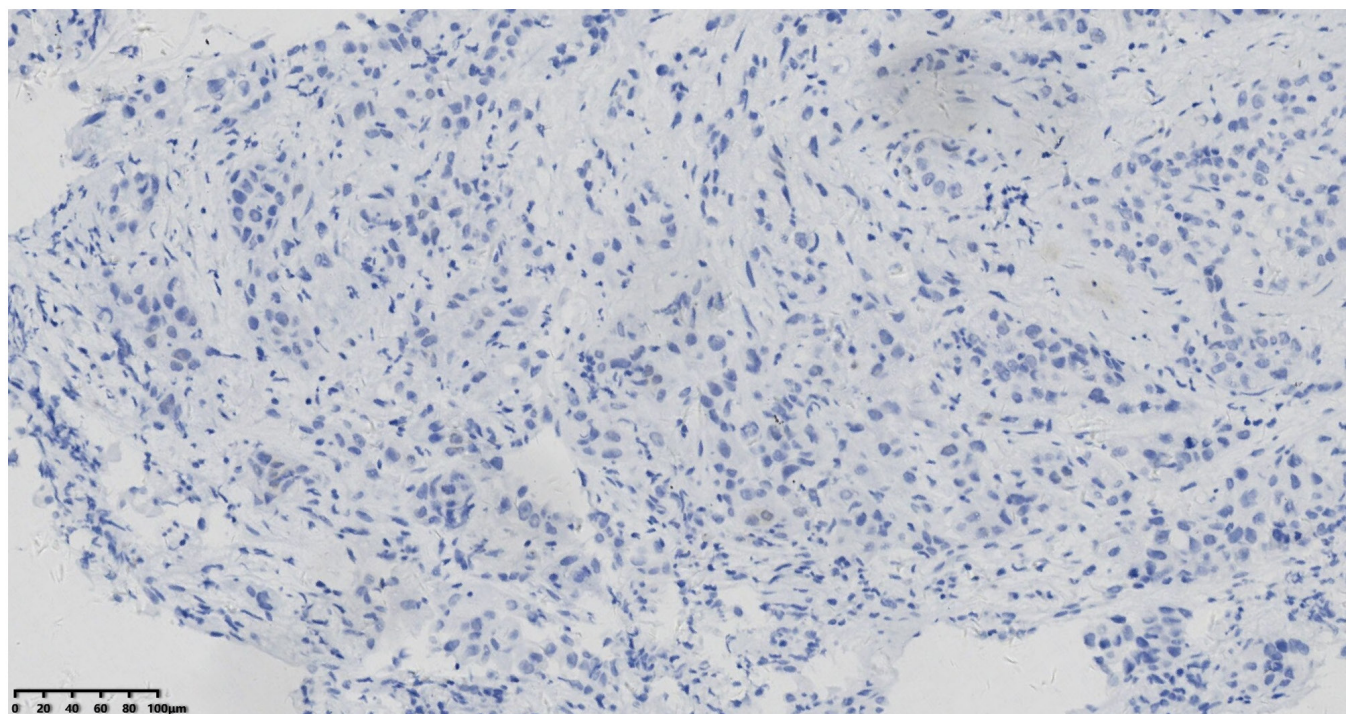

Figure S19. Tumor cells were focal weak positive for p63 (magnification, x200; scale bar, 100  $\mu$ m).

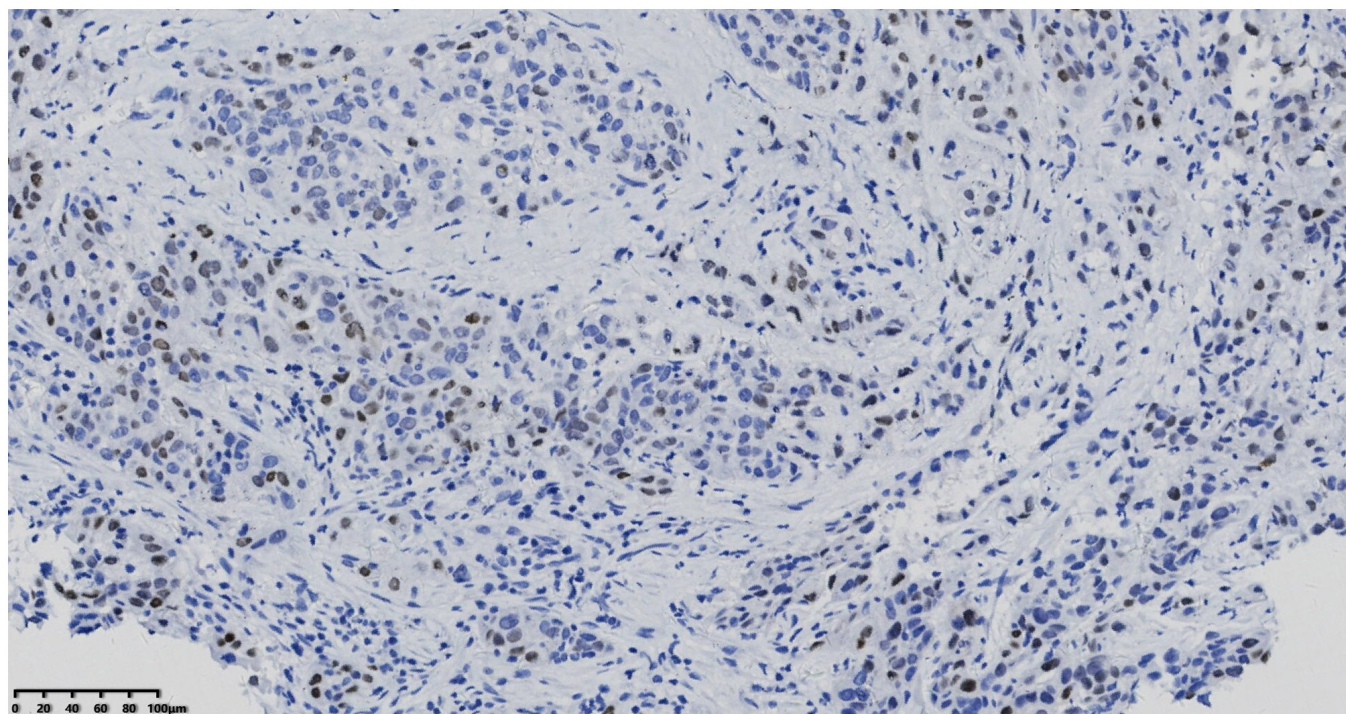

Figure S20. Tumor cells were focally positive for carcinoembryonic antigen (magnification, x200; scale bar, 100  $\mu$ m).

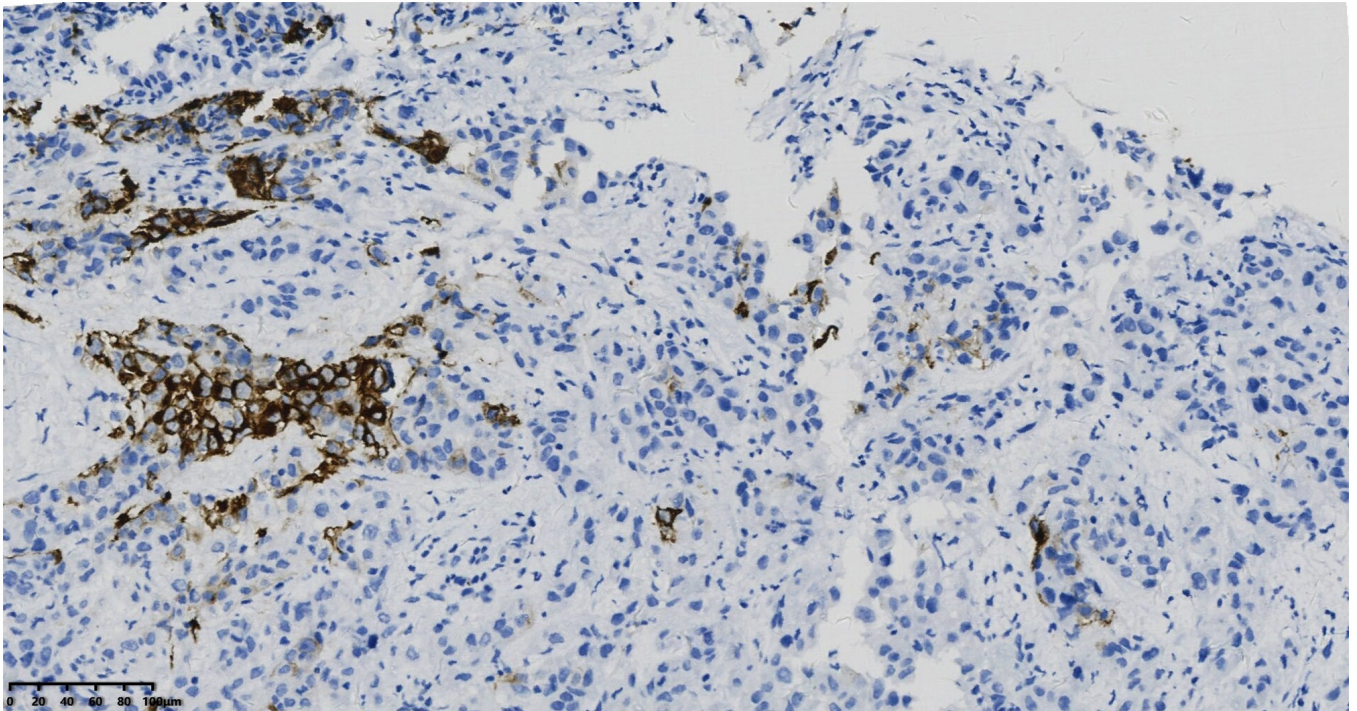

Supplement: Supplementary file 1 [file downloadSupplementary]
